# Supplementary material for: LKB1 and YAP phosphorylation play important roles in Celastrol-induced β-catenin degradation in colorectal cancer
Source: PubMed Central journal article supplement — Ther Adv Med Oncol. 2019 Apr 22;11:1758835919843736. doi: 10.1177/1758835919843736 (PMC6477772; doi:10.1177/1758835919843736), 2019-04-22
Supplement: Supplementary_material-revision_(1).pdf [file Supplementary_material-revision_%281%29.pdf]

## Supplementary Figure Legends

### Supplementary Figure 1

(A) Growth inhibition of SW480 cells by Celastrol treatment.

(B&C) Representative macroscopic images of colon tumors in AOM/DSS mice. The numbers of colon tumors (B) and the body weights of the mice (C) were analyzed. Values are means  $\pm$  S.E.M. AOM/DSS mice (n=4), AOM/DSS mice treated with Celastrol (1mg/kg) (n=5), AOM/DSS mice treated with 5-Fu (30mg/kg) (n=5).

### Supplementary Figure 2

(A) Celastrol-induced  $\beta$ -catenin down-regulation was in a dose- and time-dependent manner in SW480 and HCT116 cells.  $\beta$ -actin was used as a loading control.

(B) The  $\beta$ -catenin transcriptional activity were detected by luciferase reporter assay. Values are means  $\pm$  S.E.M. \*P<0.05.

(C) Real-time PCR analysis of  $\beta$ -catenin target gene (c-Myc, BIRC5, CYR61 and Cyclin D1) in SW480 and HCT116 cells treated with or without Celastrol (0.75 $\mu$ M). Values are means  $\pm$  S.E.M. (n=3). \*P<0.05, \*\*P<0.01, \*\*\*P<0.001.

(D) Western blot analysis of  $\beta$ -catenin and its target gene c-Myc and survivin protein in SW480 and HCT116 cells treated with or without Celastrol (0.75 $\mu$ M).  $\beta$ -actin was used as a loading control.

(E) Real-time PCR analysis of  $\beta$ -catenin and its target gene (BIRC5, c-Jun) in intestine tumor tissues of APC<sup>Min/+</sup> mice and in colon tumor tissues of AOM/DSS mice. Values are means  $\pm$  S.E.M. (n=3). \*P<0.05, \*\*P<0.01, \*\*\*P<0.001.

### Supplementary Figure 3

(A) Celastrol (0.5 $\mu$ M) and DMSO were added to T-Rex-293/ $\beta$ -catenin(S37A) cells in the absence and presence of Dox for 24h.  $\beta$ -catenin and cleaved PARP were detected.  $\beta$ -actin was used as a loading control.

(B) The colony formation of SW480, SW480/ $\beta$ -catenin(S37A) and HCT116,

HCT116/ $\beta$ -catenin(S37A) cells treated with or without Celestrol(0.75 $\mu$ M), respectively. Values are means  $\pm$  S.E.M. (n=3). \*P<0.05, \*\*P<0.01, \*\*\*P<0.001.

(C)Western blot analysis of  $\beta$ -catenin and YAP protein in cytoplasmic and nuclear fractions from SW480 cells.  $\beta$ -actin was used as a loading control for cytoplasmic protein and LaminB was used as a nuclear loading control .

(D)SW480 cells transfected with plasmids expressing wide-type or mutant(S127A) YAP, control or YAP-specific siRNA for 24h,and then the cells were treated with or without Celestrol(0.75 $\mu$ M) for another 24h, respectively. TUNEL assay was used to detect the apoptotic phenotype and the ratio of apoptotic cells was quantified. Values are means  $\pm$  S.E.M. (n=3). \*\*P<0.01.

#### **Supplementary Figure 4**

(A)The effect of cycloheximide(CHX)(10 $\mu$ g/ml) alone or in combination with Celestrol(0.75 $\mu$ M) on LKB1 expression were evaluated in SW480 and HCT116 cells at indicated time.  $\beta$ -actin was used as a loading control.

(B)The effect of MDL-28170(50 $\mu$ M)/PS-341(100nM) alone or in combination with Celestrol(0.75 $\mu$ M) on LKB1 expression were evaluated in SW480 and HCT116 cells, respectively.  $\beta$ -actin was used as a loading control.

#### **Supplementary Figure 5**

Quantification of the Western blots in Figure 1 and Figure 2. Intensity was quantified and normalized to  $\beta$ -actin. For IP assay, intensity was quantified and normalized to the corresponding control IgG.

#### **Supplementary Figure 6**

Quantification of the Western blots in Figure 3 and Figure 4. Intensity was quantified and normalized to  $\beta$ -actin. For IP assay, intensity was quantified and normalized to the corresponding control group.

### **Supplementary Figure 7**

Quantification of the Western blots in Figure 5 and Figure 6. Intensity was quantified and normalized to  $\beta$ -actin. For IP assay, intensity was quantified and normalized to the corresponding control group.
