# Supplementary material for: LKB1 and YAP phosphorylation play important roles in Celastrol-induced β-catenin degradation in colorectal cancer
Source: PubMed Central journal article supplement — Ther Adv Med Oncol. 2019 Apr 22;11:1758835919843736. doi: 10.1177/1758835919843736 (PMC6477772; doi:10.1177/1758835919843736), 2019-04-22
Supplement: Table_S1_(1).pdf [file Table_S1_%281%29.pdf]

Table S1: Primers used for Q-PCR

| Species | Oligo name       | Sense                 | Anti-sense              |
|---------|------------------|-----------------------|-------------------------|
| human   | c-Myc            | CAGCAGCCTCCCGCGACGAT  | GGGTGGGCAGCAGCTCGAAT    |
|         | BIRC5            | TTCTCAAGGACCACCGCATC  | GTTTCCTTTGCATGGGGTTCG   |
|         | CYR61            | TGCGAGGAGTGGGTCTGT    | GCGAGGCTCCATTCCAAA      |
|         | Cyclin D1        | GCGAGGAACAGAAGTGCG    | TGGAGTTGTTCGGTGTAGATGC  |
|         | GAPDH            | CTCCTGCACCACCAACTGCT  | GGGCCATCCACAGTCTTCTG    |
| mouse   | $\beta$ -catenin | AGGGTGCTATTCCACGACTA  | GTTGTGAACGTCCCGAGCAA    |
|         | BIRC5            | TTCATCCACTGCCCTACC    | GTGCTTTCTATGCTCCTCTAT   |
|         | c-Jun            | GGCACATCACCCTACACCG   | GTTCTGGCTATGCAGTTCAGC   |
|         | CYR61            | CTGCTCGCCGGCTTGTGGTT  | AGGCGGCGGGGCAGGTG       |
|         | GAPDH            | AGGTCGGTGTGAACGGATTTG | TGTAGACCATGTAGTTGAGGTCA |

Table S2: Primers used for ChIP

| Species | Oligo name | Sense                  | Anti-sense         |
|---------|------------|------------------------|--------------------|
| human   | LKB1-pro   | GGGAGGGAGGTAAACAAGATGG | CCGAGTGCCCTCAGCGTC |
